# Supplementary material for: Probing the interactions of phenol with oxygenated functional groups on curved fullerene-like sheets in activated carbon
Source: Royal Society of Chemistry journal article supplement (doi:10.1039/c5cp06089c), 2016-01-01
Supplement: c5cp06089c2.pdf [file c5cp06089c2.pdf]

Electronic Supplementary Information

**New insights into the interactions of phenol with oxygenated functional groups on curved fullerene-like sheets in activated carbon**

Chun-Yang Yin, <sup>a,§,\*</sup> Man-Fai Ng, <sup>b,§,\*</sup> Bee-Min Goh <sup>c</sup>, Martin Saunders, <sup>d</sup> Nick Hill, <sup>a</sup>  
Zhong-Tao Jiang, <sup>e</sup> Juan Balach, <sup>f</sup> Mohanad El-Harbawi, <sup>g</sup>

<sup>a</sup> *School of Science and Engineering, Teesside University, Borough Road, Middlesbrough, TS1 3BA, United Kingdom*

<sup>b</sup> *Institute of High Performance Computing, Agency for Science, Technology and Research, 1 Fusionopolis Way, #16-16 Connexis, Singapore 138632, Singapore*

<sup>c</sup> *School of Chemical Engineering and Advanced Materials, Newcastle University, NE1 7RU, United Kingdom*

<sup>d</sup> *Centre for Microscopy, Characterisation and Analysis (CMCA), The University of Western Australia (M010), 35 Stirling Highway, Crawley WA 6009, Australia*

<sup>e</sup> *Surface Analysis and Materials Engineering Research Group, School of Engineering & Information Technology, Murdoch University, Murdoch, Western Australia 6150, Australia*

<sup>f</sup> *Leibniz Institute for Solid State and Materials Research (IFW) Dresden, Institute for Complex Materials, Helmholtzstraße 20, D-01069 Dresden, Germany*

<sup>g</sup> *Chemical Engineering Department, King Saud University, Riyadh 11421, Saudi Arabia*

**Keywords:** *Activated carbon; density functional theory; transmission electron microscopy; phenol adsorption; oxygenated functional groups*

Table S1. Comparison of the effects of basis sets: 6-31G(d,p) and 6-311G\*\*. No zero-point energy corrections are applied for these testing calculations.

| Phenol Adsorption Site |                                      | Adsorption Energy in Water<br>(kcal/mol) using<br>6-31G(d,p) | Adsorption Energy in Water<br>(kcal/mol) using<br>6-311G** |
|------------------------|--------------------------------------|--------------------------------------------------------------|------------------------------------------------------------|
| 1                      | Virgin carbon sheet                  | -27.41                                                       | -29.35                                                     |
| 2                      | Carbon sheet with<br>2×COOH on plane | -27.79                                                       | -29.48                                                     |
| 8                      | COOH on carbon sheet                 | -19.83                                                       | -20.09                                                     |
